# Supplementary material for: A conformational factorisation approach for estimating the binding free energies of macromolecules
Source: Royal Society of Chemistry journal article supplement (doi:10.1039/c3cp53537a), 2013-10-31
Supplement: c3cp53537a.pdf [file c3cp53537a.pdf]

# **Supporting Information**

## **A Conformational Factorisation Approach for Estimating the Binding Free Energies of Macromolecules**

K. Mochizuki, C.S. Whittleston, S. Somani, H. Kusumaatmaja and D.J. Wales

| Residue name  | Three letter code | $\theta_i^{\max}/2\pi$ |               |                |
|---------------|-------------------|------------------------|---------------|----------------|
|               |                   | $\alpha\beta$          | $\beta\gamma$ | $\gamma\delta$ |
| Alanine       | ALA               | 1.0                    | -             | -              |
| Arginine      | ARG               | 0.2                    | 0.3           | 0.5            |
| Asparagine    | ASN               | 0.5                    | 1.0           | -              |
| Aspartic acid | ASP               | 0.5                    | 1.0           | -              |
| Cysteine      | CYS               | 1.0                    | -             | -              |
| Glutamic acid | GLU               | 0.3                    | 0.5           | 1.0            |
| Glutamine     | GLN               | 0.3                    | 0.5           | 1.0            |
| Glycine       | GLY               | -                      | -             | -              |
| Histidine     | HIS               | 0.3                    | 0.5           | -              |
| Isoleucine    | ILE               | 0.5                    | 1.0           | -              |
| Leucine       | LEU               | 0.5                    | 1.0           | -              |
| Lysine        | LYS               | 0.2                    | 0.3           | 0.5            |
| Methionine    | MET               | 0.5                    | 0.6           | -              |
| Phenylalanine | PHE               | 0.3                    | 0.5           | -              |
| Proline       | PRO               | -                      | -             | -              |
| Serine        | SER               | 1.0                    | -             | -              |
| Threonine     | THR               | 1.0                    | -             | -              |
| Tryptophan    | TRP               | 0.3                    | 0.4           | -              |
| Tyrosine      | TYR               | 0.3                    | 0.5           | -              |
| Valine        | VAL               | 1.0                    | -             | -              |

TABLE S1: The maximum rotation amplitudes  $\theta_i^{\max}$  for the amino acid side chain groups used in the current work.  $\alpha\beta$ ,  $\beta\gamma$  and  $\gamma\delta$  refer to rotation about the  $C_\alpha$ - $C_\beta$ ,  $C_\beta$ - $C_\gamma$  and  $C_\gamma$ - $C_\delta$  bonds respectively.

| PDB ID | $C_{\alpha}$ -RMSD from 2INE (Å) |                     | Note                                                 |
|--------|----------------------------------|---------------------|------------------------------------------------------|
|        | All                              | in 16 Å from ligand |                                                      |
| 2INE   | 0.000                            | 0.000               | Complexed with Phenylacetic Acid, RMSD reference     |
| 2IQ0   | 0.094                            | 0.085               | Complexed with Hexanoic Acid                         |
| 2IS7   | 0.137                            | 0.145               | Complexed with Dichlorophenylacetic Acid             |
| 2INZ   | 0.155                            | 0.134               | Complexed with 2-Hydroxyphenylacetic Acid            |
| 1AH0   | 0.497                            | 0.248               | Pig aldose reductase complexed with Sorbinil         |
| 1EL3   | 0.301                            | 0.156               | Complexed with IDD384 inhibitor                      |
| 1EKO   | 0.474                            | 0.290               | Pig aldose reductase complexed with IDD384 inhibitor |
| 1IEI   | 0.723                            | 0.609               | Complexed with Zenarestat                            |
| 1MAR   | 0.482                            | 0.495               | Complexed with Zopolrestat                           |

TABLE S2:  $C_{\alpha}$  - RMSD between 2INE which we used as “St-1” and 8 aldose reductase crystal structures with different ligands bound.  $C_{\alpha}$ -RMSD for each pair is calculated for the whole system and the residues within 16 Å of the ligand, respectively.

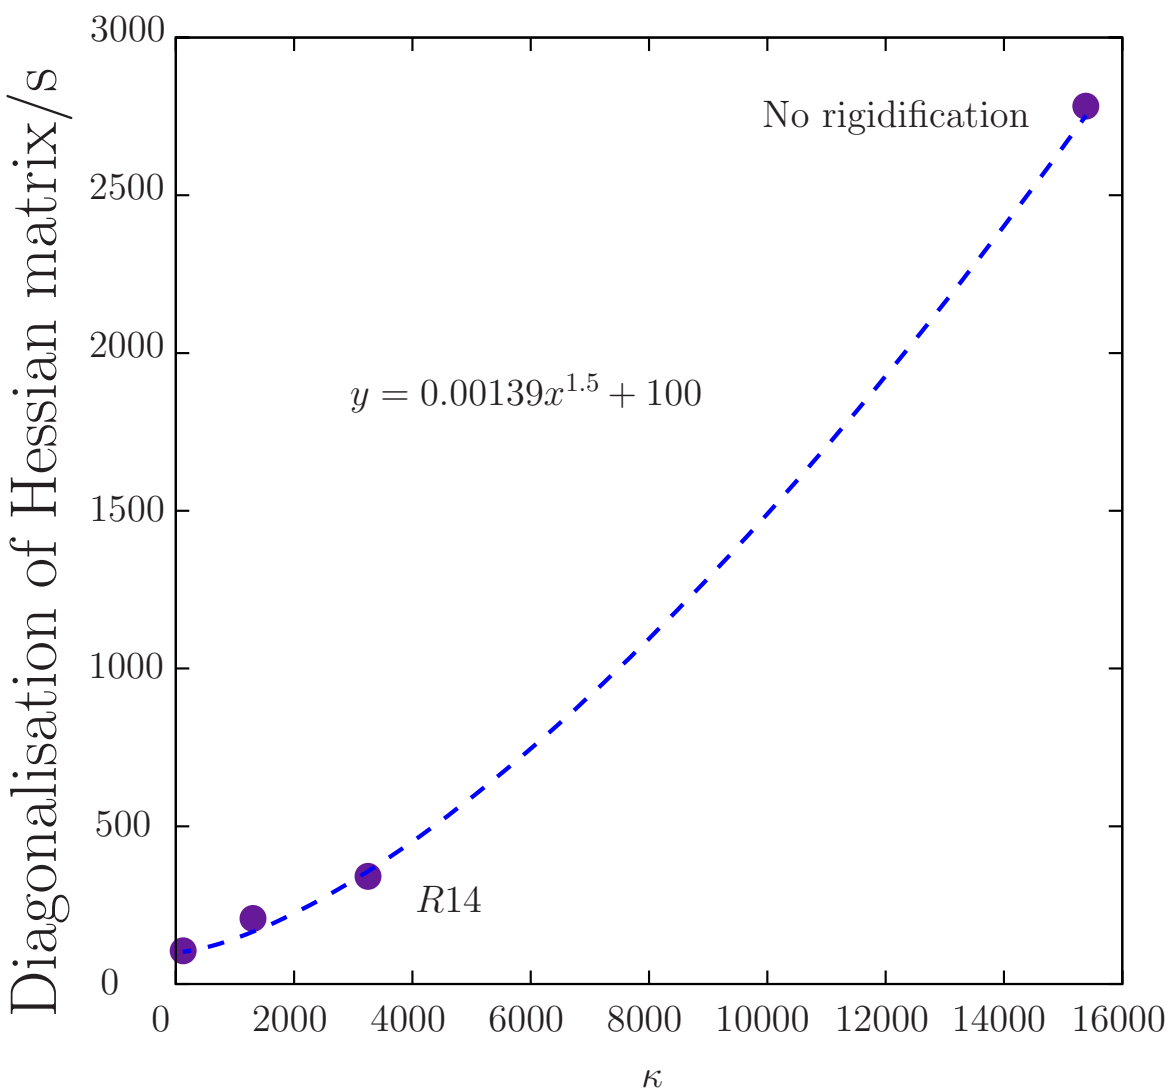

FIGURE S1: Average calculation time for diagonalisation of the Hessian matrix.  $\kappa = 120$ , 1299, 3246, corresponding to complexes with  $R = 6, 10, 14$ , and  $\kappa = 15387$  (without any rigidification) are plotted. The fitting line scales as  $\kappa^{1.5}$ , described as blue dashed line. The calculations were performed on a 2.6GHz Xeon X5650 machine.

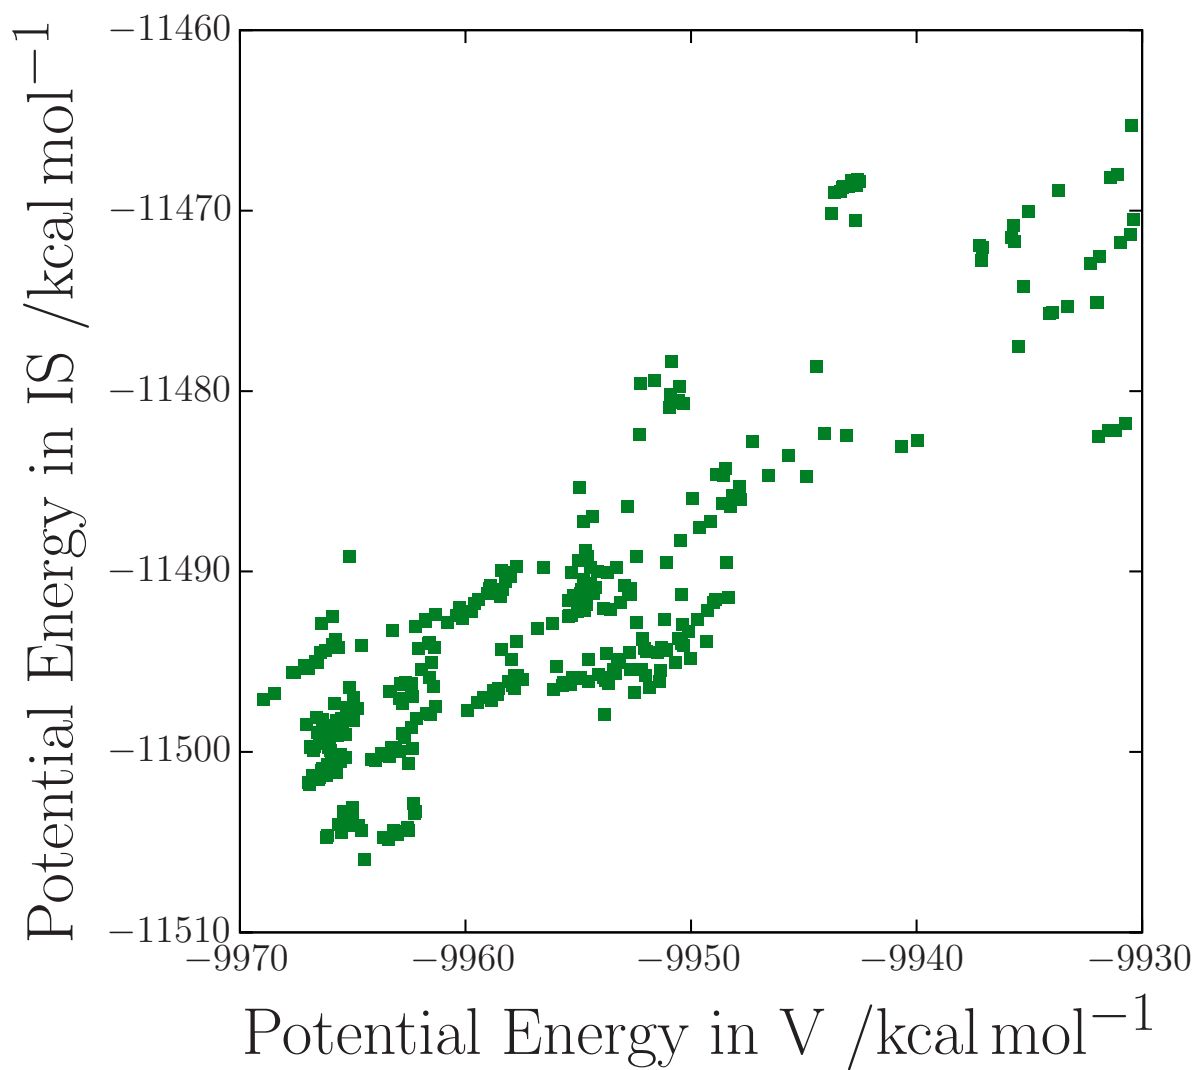

FIGURE S2: The potential energies in vacuum (V) and the corresponding recomputed energies in the implicit solvent (IS) are plotted. The Pearson correlation coefficient is 0.86.

## Hessian in the local rigid body coordinates

In this section, we detail the derivations of the Hessian in the local rigid body coordinates. Our starting point is the first derivatives of the potential energy. For the translational degrees of freedom,  $\mathbf{r}^I$ , this is given by

$$\frac{\partial V}{\partial r_\alpha^I} = \sum_{i \in I} \sum_{a=1}^3 \frac{\partial V}{\partial r_a^I(i)} \frac{\partial r_a^I(i)}{\partial r_\alpha^I} = \sum_{i \in I} \frac{\partial V}{\partial r_\alpha^I(i)}. \quad (1)$$

Additionally, the first derivative of the potential energy with respect to the rotational degrees of freedom,  $\mathbf{p}^I$ , gives

$$\frac{\partial V}{\partial p_\alpha^I} = \sum_{i \in I} \sum_{a=1}^3 \frac{\partial V}{\partial r_a^I(i)} \frac{\partial r_a^I(i)}{\partial p_\alpha^I} = \sum_{i \in I} \sum_{a=1}^3 \frac{\partial V}{\partial r_a^I(i)} \left[ \frac{\partial \mathbf{S}^I}{\partial p_\alpha^I} \mathbf{x}^I(i) \right]_a. \quad (2)$$

We have employed the following relations in the above partial derivatives

$$\mathbf{r}^i = \mathbf{r}^I + \mathbf{S}^I \mathbf{x}^I(i); \quad i \in I, \quad (3)$$

$$\frac{\partial r_a^I(i)}{\partial r_\alpha^I} = \delta_{a\alpha}, \quad (4)$$

$$\frac{\partial r_a^I(i)}{\partial p_\alpha^I} = \left[ \frac{\partial \mathbf{S}^I}{\partial p_\alpha^I} \mathbf{x}^I(i) \right]_a. \quad (5)$$

The second derivatives then follow in a similar manner. There are four separate cases to consider, and we derive them below for each case

$$\frac{\partial^2 V}{\partial r_\alpha^I \partial r_\beta^J} = \frac{\partial}{\partial r_\alpha^I} \left( \sum_{j \in J} \frac{\partial V}{\partial r_\beta^J(j)} \right) = \sum_{j \in J} \frac{\partial}{\partial r_\alpha^I} \left( \frac{\partial V}{\partial r_\beta^J(j)} \right) = \sum_{i \in I} \sum_{j \in J} \frac{\partial^2 V}{\partial r_\alpha^I(i) \partial r_\beta^J(j)}. \quad (6)$$

$$\begin{aligned} \frac{\partial^2 V}{\partial r_\alpha^I \partial p_\beta^J} &= \frac{\partial}{\partial r_\alpha^I} \left( \sum_{j \in J} \sum_{a=1}^3 \frac{\partial V}{\partial r_a^J(j)} \left[ \frac{\partial \mathbf{S}^J}{\partial p_\beta^J} \mathbf{x}^J(j) \right]_a \right) \\ &= \sum_{j \in J} \sum_{a=1}^3 \frac{\partial}{\partial r_\alpha^I} \left( \frac{\partial V}{\partial r_a^J(j)} \right) \left[ \frac{\partial \mathbf{S}^J}{\partial p_\beta^J} \mathbf{x}^J(j) \right]_a \\ &= \sum_{i \in I} \sum_{j \in J} \sum_{a=1}^3 \frac{\partial^2 V}{\partial r_\alpha^I(i) \partial r_a^J(j)} \left[ \frac{\partial \mathbf{S}^J}{\partial p_\beta^J} \mathbf{x}^J(j) \right]_a. \end{aligned} \quad (7)$$

$$\begin{aligned}
 \frac{\partial^2 V}{\partial p_\alpha^I \partial p_\beta^J} &= \frac{\partial}{\partial p_\alpha^I} \left( \sum_{j \in J} \sum_{a=1}^3 \frac{\partial V}{\partial r_a^J(j)} \left[ \frac{\partial \mathbf{S}^J}{\partial p_\beta^J} \mathbf{x}^J(j) \right]_a \right), \quad \text{for } I \neq J \\
 &= \sum_{j \in J} \sum_{a=1}^3 \frac{\partial}{\partial r_a^J(j)} \left( \frac{\partial V}{\partial p_\alpha^I} \right) \left[ \frac{\partial \mathbf{S}^J}{\partial p_\beta^J} \mathbf{x}^J(j) \right]_a \\
 &= \sum_{i \in I} \sum_{j \in J} \sum_{a=1}^3 \sum_{b=1}^3 \frac{\partial^2 V}{\partial r_b^I(i) \partial r_a^J(j)} \left[ \frac{\partial \mathbf{S}^I}{\partial p_\alpha^I} \mathbf{x}^I(i) \right]_b \left[ \frac{\partial \mathbf{S}^J}{\partial p_\beta^J} \mathbf{x}^J(j) \right]_a.
 \end{aligned} \tag{8}$$

$$\begin{aligned}
 \frac{\partial^2 V}{\partial p_\alpha^I \partial p_\beta^I} &= \frac{\partial}{\partial p_\alpha^I} \left( \sum_{i \in I} \sum_{a=1}^3 \frac{\partial V}{\partial r_a^I(i)} \left[ \frac{\partial \mathbf{S}^I}{\partial p_\beta^I} \mathbf{x}^I(i) \right]_a \right) \\
 &= \sum_{i \in I} \sum_{a=1}^3 \frac{\partial}{\partial r_a^I(i)} \left( \frac{\partial V}{\partial p_\alpha^I} \right) \left[ \frac{\partial \mathbf{S}^I}{\partial p_\beta^I} \mathbf{x}^I(i) \right]_a + \sum_{i \in I} \sum_{a=1}^3 \frac{\partial V}{\partial r_a^I(i)} \left[ \frac{\partial}{\partial p_\alpha^I} \left( \frac{\partial \mathbf{S}^I}{\partial p_\beta^I} \right) \mathbf{x}^I(i) \right]_a \\
 &= \sum_{i_1 \in I} \sum_{i_2 \in I} \sum_{a=1}^3 \sum_{b=1}^3 \frac{\partial^2 V}{\partial r_b^I(i_1) \partial r_a^I(i_2)} \left[ \frac{\partial \mathbf{S}^I}{\partial p_\alpha^I} \mathbf{x}^I(i_1) \right]_b \left[ \frac{\partial \mathbf{S}^I}{\partial p_\beta^I} \mathbf{x}^I(i_2) \right]_a \\
 &\quad + \sum_{i \in I} \sum_{a=1}^3 \frac{\partial V}{\partial r_a^I(i)} \left[ \frac{\partial^2 \mathbf{S}^I}{\partial p_\alpha^I \partial p_\beta^I} \mathbf{x}^I(i) \right]_a.
 \end{aligned} \tag{9}$$
